# Supplementary material for: High-Level Extracellular Production of a Trisaccharide-Producing Alginate Lyase AlyC7 in Escherichia coli and Its Agricultural Application
Source: MDPI journal article supplement (doi:10.3390/md22050230), 2024-05-18
Supplement: s1 [file s1]

**Table S1.** Orthogonal experiment design and results of L<sub>9</sub>(3<sup>4</sup>).

| Experiment number | Induction temperature (°C) (A) | Glycine concentration (mM) (B) | Induction time (h) (C) | Blank (D) | Extracellular alginolytic activity (U/mL) |
|-------------------|--------------------------------|--------------------------------|------------------------|-----------|-------------------------------------------|
| 1                 | 18                             | 300                            | 36                     | 0         | 933.4                                     |
| 2                 | 18                             | 400                            | 24                     | 0         | 706.3                                     |
| 3                 | 18                             | 500                            | 48                     | 0         | 919.7                                     |
| 4                 | 20                             | 300                            | 24                     | 0         | 824.7                                     |
| 5                 | 20                             | 400                            | 48                     | 0         | 945.9                                     |
| 6                 | 20                             | 500                            | 36                     | 0         | 814.8                                     |
| 7                 | 22                             | 300                            | 48                     | 0         | 544.8                                     |
| 8                 | 22                             | 400                            | 36                     | 0         | 731.4                                     |
| 9                 | 22                             | 500                            | 24                     | 0         | 976.2                                     |

**Table S2.** Analysis of the results of orthogonal experiment.

| Parameters                                |                              | Level 1      | Level 2      | Level 3      |
|-------------------------------------------|------------------------------|--------------|--------------|--------------|
| Extracellular alginolytic activity (U/mL) | K <sub>AX</sub> <sup>a</sup> | 853.2        | <b>861.8</b> | 750.8        |
|                                           | K <sub>BX</sub> <sup>a</sup> | 767.6        | 794.5        | <b>903.6</b> |
|                                           | K <sub>CX</sub> <sup>a</sup> | <b>835.8</b> | 826.5        | 803.5        |

<sup>a</sup> K<sub>mx</sub> represents the average targeting value of each factor and can be defined as  $K_{mx} = G_{mx}/k_x$ ,

where x (x=1, 2, 3) and m (m=A, B, C) indicate the level number and the factor, respectively.

G<sub>mx</sub> denotes the sum of the targeting indexes of all levels in each factor m, and k<sub>x</sub> stands for the total level of the corresponding factor.

**Table S3.** The signal peptide sequences for the construction of the expression vectors.

| Signal peptide | Amino acid sequences | DNA sequences (5'-3') |
|----------------|----------------------|-----------------------|
|----------------|----------------------|-----------------------|

---

|                   |                                |                         |
|-------------------|--------------------------------|-------------------------|
| Natural<br>signal | MKQITIKTLLASSILLAVG            | ATGCGGGCGAAACTTCTGGGAA  |
|                   |                                | TAGTCCTGACAACCCCTATTGC  |
|                   |                                | GATCAGCTCTTTT           |
| PelB              | MKYLLPTAAAGLLLLAAQPA<br>MA     | ATGAAATACCTGCTGCCGACCG  |
|                   |                                | CTGCTGCTGGTCTGCTGCTCCT  |
|                   |                                | CGCTGCCCAGCCGGCGATGGCC  |
| MalE              | MKIKTGARILALSALTTMMFS<br>ASALA | ATGAAAATAAAAACAGGTGCAC  |
|                   |                                | GCATCCTCGCATTATCCGCATTA |
|                   |                                | ACGACGATGATGTTTTCCGCCT  |
| PhoA              | MKQSTIALALLPLLFTPVTKA          | CGGCTCTCGCC             |
|                   |                                | ATGAAACAGTCGACTATTGCAC  |
|                   |                                | TGGCACTGCTGCCGCTGCTGTT  |
| OmpT              | MRAKLLGIVLTTPIAISSFA           | TACACCGGTAACAAAAGCA     |
|                   |                                | ATGCGGGCGAAACTTCTGGGAA  |
|                   |                                | TAGTCCTGACAACCCCTATTGC  |
| OmpA              | MKKTAIAIAVALAGFATVAQA          | GATCAGCTCTTTTGCT        |
|                   |                                | ATGAAAAAGACAGCTATCGCGA  |
|                   |                                | TTGCAGTGGCACTGGCTGGTTT  |
|                   |                                | CGCTACCGTAGCGCAGGCC     |

---

**Table S4.** Design of the orthogonal experiment.

|         | Induction<br>temperature (°C)<br>(factor A) | Glycine<br>concentration (mM)<br>(factor B) | Induction time (h)<br>(factor C) | Blank<br>(factor D) |
|---------|---------------------------------------------|---------------------------------------------|----------------------------------|---------------------|
| Level 1 | 18                                          | 300                                         | 24                               | 0                   |
| Level 2 | 20                                          | 400                                         | 36                               | 0                   |
| Level 3 | 22                                          | 500                                         | 48                               | 0                   |
